# Supplementary material for: Alterations in Alzheimer’s Disease-Associated Gene Expression in Severe Obstructive Sleep Apnea Patients
Source: PubMed Central journal article supplement (PMC6780075; doi:10.3390/jcm8091361), 2019-09-01
Supplement: jcm-08-01361-s001.pdf [file jcm-08-01361-s001.pdf]

## Supplementary Online Content

**Table S1.** Genes and pseudogenes associated with Alzheimer's disease.

| Gene Symbol   | Name                                                | Gene Length | Onset of Alzheimer's Disease | ENSEMBL Gene ID |
|---------------|-----------------------------------------------------|-------------|------------------------------|-----------------|
| <i>APP</i>    | amyloid beta (A4) precursor protein                 | 2326.72     | early                        | ENSG00000142192 |
| <i>FKBP1B</i> | FK506 binding protein 1B                            | 929.42      | early                        | ENSG00000119782 |
| <i>PSEN1</i>  | presenilin 1                                        | 3941.76     | early                        | ENSG00000080815 |
| <i>PSEN2</i>  | presenilin 2                                        | 1389.34     | early                        | ENSG00000143801 |
| <i>ABCA1</i>  | ATP-binding cassette, sub-family A (ABC1), member 1 | 10494       | late                         | ENSG00000165029 |
| <i>ABCA7</i>  | ATP-binding cassette, sub-family A (ABC1), member 7 | 1468.3      | late                         | ENSG00000064687 |
| <i>ANK1</i>   | ankyrin 1, erythrocytic                             | 2108.51     | late                         | ENSG00000029534 |
| <i>APOC1</i>  | apolipoprotein C-I                                  | 446.35      | late                         | ENSG00000130208 |
| <i>APOE</i>   | apolipoprotein E                                    | 1124.92     | late                         | ENSG00000130203 |
| <i>BACE2</i>  | beta-site APP-cleaving enzyme 2                     | 2372.29     | late                         | ENSG00000182240 |
| <i>BCR</i>    | breakpoint cluster region                           | 2509.52     | late                         | ENSG00000186716 |
| <i>BIN1</i>   | bridging integrator 1                               | 1549.99     | late                         | ENSG00000136717 |
| <i>CASS4</i>  | Cas scaffolding protein family member 4             | 2883.85     | late                         | ENSG00000087589 |
| <i>CCL2</i>   | chemokine (C-C motif) ligand 2                      | 753.22      | late                         | ENSG00000108691 |
| <i>CD2AP</i>  | CD2-associated protein                              | 5412        | late                         | ENSG00000198087 |
| <i>CD33</i>   | CD33 molecule                                       | 1613.85     | late                         | ENSG00000105383 |
| <i>CELF1</i>  | CUGBP, Elav-like family member 1                    | 4778.25     | late                         | ENSG00000149187 |
| <i>CLU</i>    | clusterin                                           | 607.12      | late                         | ENSG00000120885 |
| <i>COX4I1</i> | cytochrome c oxidase subunit IV isoform 1           | 711.38      | late                         | ENSG00000131143 |

|                 |                                                                                                                |         |      |                 |
|-----------------|----------------------------------------------------------------------------------------------------------------|---------|------|-----------------|
| <i>CR1</i>      | complement component<br>(3b/4b) receptor 1 (Knops<br>blood group)                                              | 7442.25 | late | ENSG00000203710 |
| <i>CXCL8</i>    | chemokine (C-X-C motif)<br>ligand 8                                                                            | 1248.62 | late | ENSG00000169429 |
| <i>DSG2</i>     | desmoglein 2                                                                                                   | 5831    | late | ENSG00000046604 |
| <i>EPHA1</i>    | EPH receptor A1                                                                                                | 2181.3  | late | ENSG00000146904 |
| <i>EPHA10</i>   | EPH receptor A10                                                                                               | 3964    | late | ENSG00000183317 |
| <i>FAM136A</i>  | family with sequence<br>similarity 136, member A                                                               | 1794.23 | late | ENSG00000035141 |
| <i>FERMT2</i>   | fermitin family member 2                                                                                       | 2678.61 | late | ENSG00000073712 |
| <i>GAS7</i>     | growth arrest-specific 7                                                                                       | 4414.8  | late | ENSG00000007237 |
| <i>GRIK2</i>    | glutamate receptor,<br>ionotropic, kainate 2                                                                   | 4185    | late | ENSG00000164418 |
| <i>GRN</i>      | granulin                                                                                                       | 1084.03 | late | ENSG00000030582 |
| <i>HAS3</i>     | hyaluronan synthase 3                                                                                          | 1342.72 | late | ENSG00000103044 |
| <i>HLA-A</i>    | major histocompatibility<br>complex, class I, A                                                                | 5422    | late | ENSG00000206503 |
| <i>HLA-DRB1</i> | major histocompatibility<br>complex, class II, DR beta 1                                                       | 1229    | late | ENSG00000196126 |
| <i>HLA-DRB5</i> | major histocompatibility<br>complex, class II, DR beta                                                         | 1260    | late | ENSG00000198502 |
| <i>IL1RN</i>    | interleukin 1 receptor<br>antagonist                                                                           | 1776.01 | late | ENSG00000136689 |
| <i>IL6</i>      | interleukin 6                                                                                                  | 885.33  | late | ENSG00000136244 |
| <i>ITGAL</i>    | integrin, alpha L (antigen<br>CD11A (p180), lymphocyte<br>function-associated antigen<br>1; alpha polypeptide) | 1875.14 | late | ENSG00000005844 |
| <i>KLK2</i>     | kallikrein-related peptidase<br>2                                                                              | 528     | late | ENSG00000167751 |
| <i>LRP2</i>     | low density lipoprotein<br>receptor-related protein 2                                                          | 3156    | late | ENSG00000081479 |

|                |                                                                                    |          |      |                 |
|----------------|------------------------------------------------------------------------------------|----------|------|-----------------|
| <i>MAPT</i>    | microtubule-associated<br>protein tau                                              | 2987.74  | late | ENSG00000186868 |
| <i>MEF2C</i>   | myocyte enhancer factor 2C                                                         | 3003     | late | ENSG00000081189 |
| <i>MS4A4</i>   | membrane-spanning 4-<br>domains, subfamily A,<br>member 8                          | 1353     | late | ENSG00000166959 |
| <i>MS4A6E</i>  | membrane-spanning 4-<br>domains, subfamily A,<br>member 6E<br>phosphatidylinositol | 711      | late | ENSG00000166926 |
| <i>PICALM</i>  | binding clathrin assembly<br>protein                                               | 1679.44  | late | ENSG00000073921 |
| <i>PIN1</i>    | peptidylprolyl cis/trans<br>isomerase, NIMA-<br>interacting 1                      | 1193.02  | late | ENSG00000127445 |
| <i>PILRA</i>   | paired immunoglobulin-like<br>type 2 receptor alpha                                | 1302.4   | late | ENSG00000085514 |
| <i>PLD3</i>    | phospholipase D family,<br>member 3                                                | 1163.79  | late | ENSG00000105223 |
| <i>PRSS42</i>  | protease, serine, 42                                                               | 1280     | late | ENSG00000178055 |
| <i>PRSS45</i>  | protease, serine, 45                                                               | 3128     | late | ENSG00000188086 |
| <i>PTK2B</i>   | protein tyrosine kinase 2<br>beta                                                  | 3722.59  | late | ENSG00000120899 |
| <i>RIN3</i>    | Ras and Rab interactor 3                                                           | 3419.45  | late | ENSG00000100599 |
| <i>SEC31A</i>  | SEC31 homolog A, COPII<br>coat complex component                                   | 2083.44  | late | ENSG00000138674 |
| <i>SLC22A2</i> | solute carrier family 22<br>(organic cation transporter),<br>member 2              | 2597     | late | ENSG00000112499 |
| <i>SLC24A4</i> | solute carrier family 24<br>(sodium/potassium/calcium<br>exchanger), member 4      | 9950     | late | ENSG00000140090 |
| <i>SORL1</i>   | sortilin-related receptor, L<br>(DLR class) A repeats<br>containing                | 10009.75 | late | ENSG00000137642 |

|               |                                                     |         |      |                 |
|---------------|-----------------------------------------------------|---------|------|-----------------|
| <i>STOX2</i>  | Storkhead Box 2                                     | 3626.57 | late | ENSG00000173320 |
| <i>THNSL2</i> | threonine synthase-like 2                           | 1609.65 | late | ENSG00000144115 |
| <i>TMIE</i>   | transmembrane inner ear                             | 1824    | late | ENSG00000181585 |
| <i>TRDMT1</i> | TRNA aspartic acid<br>methyltransferase 1           | 3705.83 | late | ENSG00000107614 |
| <i>TREM2</i>  | triggering receptor<br>expressed on myeloid cells 2 | 1044    | late | ENSG00000095970 |
| <i>ZCWPW1</i> | zinc finger, CW type with<br>PWWP domain 1          | 1893.78 | late | ENSG00000078487 |

---

**Table S2.** Summary of the expressions of 60 Alzheimer's disease-associated genes and pseudogenes in the severe OSA and non-severe OSA groups in descending order by probability.

| Gene Symbol     | Expression |                | Log <sub>2</sub> (Fold Change) | Regulation | Probability        |
|-----------------|------------|----------------|--------------------------------|------------|--------------------|
|                 | Severe OSA | Non-Severe OSA |                                |            |                    |
| <i>CCL2</i>     | 12.992     | 116.716        | -3.167                         | Down       | 0.868 <sup>a</sup> |
| <i>IL6</i>      | 2.854      | 33.06          | -3.534                         | Down       | 0.857 <sup>a</sup> |
| <i>CXCL8</i>    | 2.042      | 20.058         | -3.296                         | Down       | 0.824 <sup>a</sup> |
| <i>HLA-A</i>    | 1.272      | 14.006         | -3.460                         | Down       | 0.811 <sup>a</sup> |
| <i>IL1RN</i>    | 239.35     | 57.236         | 2.064                          | Up         | 0.806 <sup>a</sup> |
| <i>HLA-DRB1</i> | 41.398     | 14.398         | 1.523                          | Up         | 0.716              |
| <i>ITGAL</i>    | 6.81       | 1.944          | 1.808                          | Up         | 0.635              |
| <i>HLA-DRB5</i> | 22.194     | 10.358         | 1.099                          | Up         | 0.617              |
| <i>CLU</i>      | 490.412    | 308.192        | 0.670                          | Up         | 0.522              |
| <i>MS4A4</i>    | 2.176      | 4.908          | -1.173                         | Down       | 0.512              |
| <i>APP</i>      | 382.418    | 587.644        | -0.619                         | Down       | 0.503              |
| <i>TRDMT1</i>   | 2.702      | 5.57           | -1.043                         | Down       | 0.502              |
| <i>ANK1</i>     | 3.87       | 1.878          | 1.043                          | Up         | 0.464              |
| <i>CR1</i>      | 1.076      | 0.214          | 2.329                          | Up         | 0.439              |
| <i>EPHA1</i>    | 6.552      | 4.254          | 0.623                          | Up         | 0.408              |
| <i>MS4A6E</i>   | 0.39       | 1.174          | -1.590                         | Down       | 0.399              |
| <i>BACE2</i>    | 69.39      | 90.6           | -0.385                         | Down       | 0.390              |
| <i>ABCA7</i>    | 3.636      | 2.218          | 0.713                          | Up         | 0.385              |
| <i>MAPT</i>     | 1.134      | 0.408          | 1.475                          | Up         | 0.382              |
| <i>PTK2B</i>    | 9.514      | 6.938          | 0.456                          | Up         | 0.376              |
| <i>DSG2</i>     | 24.424     | 31.632         | -0.373                         | Down       | 0.375              |
| <i>GAS7</i>     | 5.698      | 3.952          | 0.528                          | Up         | 0.370              |
| <i>PILRA</i>    | 1.406      | 2.452          | -0.802                         | Down       | 0.370              |
| <i>FERMT2</i>   | 14.036     | 17.708         | -0.335                         | Down       | 0.348              |
| <i>BIN1</i>     | 23.218     | 18.884         | 0.298                          | Up         | 0.335              |
| <i>CASS4</i>    | 13.794     | 16.864         | -0.290                         | Down       | 0.323              |
| <i>APOE</i>     | 24.526     | 29.308         | -0.257                         | Down       | 0.318              |
| <i>SEC31A</i>   | 136.526    | 159.614        | -0.225                         | Down       | 0.311              |
| <i>CD33</i>     | 1.416      | 2.06           | -0.541                         | Down       | 0.304              |
| <i>PLD3</i>     | 121.136    | 139.682        | -0.206                         | Down       | 0.300              |

|                |         |         |        |      |       |
|----------------|---------|---------|--------|------|-------|
| <i>PIN1</i>    | 23.774  | 27.412  | -0.205 | Down | 0.291 |
| <i>GRN</i>     | 133.2   | 116.384 | 0.195  | Up   | 0.289 |
| <i>PSEN1</i>   | 12.776  | 14.876  | -0.220 | Down | 0.286 |
| <i>RIN3</i>    | 2.84    | 2.234   | 0.346  | Up   | 0.276 |
| <i>SORL1</i>   | 8.136   | 9.338   | -0.199 | Down | 0.267 |
| <i>PSEN2</i>   | 7.204   | 6.208   | 0.215  | Up   | 0.265 |
| <i>APOC1</i>   | 6.362   | 7.216   | -0.182 | Down | 0.252 |
| <i>ABCA1</i>   | 1.152   | 0.866   | 0.412  | Up   | 0.248 |
| <i>COX4I1</i>  | 142.382 | 153.196 | -0.106 | Down | 0.240 |
| <i>CELF1</i>   | 9.536   | 8.628   | 0.144  | Up   | 0.240 |
| <i>PICALM</i>  | 56.394  | 52.512  | 0.103  | Up   | 0.233 |
| <i>TREM2</i>   | 0.856   | 1.076   | -0.330 | Down | 0.232 |
| <i>FAM136A</i> | 15.05   | 16.288  | -0.114 | Down | 0.232 |
| <i>BCR</i>     | 21.86   | 20.414  | 0.099  | Up   | 0.228 |
| <i>SLC22A2</i> | 0.056   | 0.01    | 2.485  | Up   | 0.224 |
| <i>ZCWPW1</i>  | 1.442   | 1.674   | -0.215 | Down | 0.223 |
| <i>MEF2C</i>   | 16.674  | 15.664  | 0.090  | Up   | 0.221 |
| <i>CD2AP</i>   | 19.416  | 20.49   | -0.078 | Down | 0.217 |
| <i>FKBP1B</i>  | 3.786   | 4.126   | -0.124 | Down | 0.216 |
| <i>HAS3</i>    | 5.378   | 5.772   | -0.102 | Down | 0.214 |
| <i>EPHA10</i>  | 0.476   | 0.576   | -0.275 | Down | 0.207 |
| <i>SLC24A4</i> | 0.202   | 0.274   | -0.440 | Down | 0.205 |
| <i>THNSL2</i>  | 8.034   | 7.658   | 0.069  | Up   | 0.204 |
| <i>LRP2</i>    | 0.288   | 0.22    | 0.389  | Up   | 0.203 |
| <i>PRSS45</i>  | 0.054   | 0.022   | 1.295  | Up   | 0.196 |
| <i>GRIK2</i>   | 0.312   | 0.368   | -0.238 | Down | 0.196 |
| <i>TMIE</i>    | 0.112   | 0.084   | 0.415  | Up   | 0.190 |
| <i>KLK2</i>    | 0.448   | 0.49    | -0.129 | Down | 0.186 |
| <i>STOX2</i>   | 2.428   | 2.48    | -0.031 | Down | 0.180 |
| <i>PRSS42</i>  | 0.036   | 0.022   | 0.710  | Up   | 0.180 |

Abbreviations: OSA, obstructive sleep apnea. \*Significantly up- and down-regulated genes were defined as FDR  $\leq 0.001$  (i.e. probability  $\geq 0.8$ ) and an absolute value of Log<sub>2</sub>Ratio  $\geq 1$ .

**Table S3.** Results of Gene Ontology related to five Alzheimer's disease-associated differentially expressed genes in severe OSA patients.

| <b>Term</b>                                                     | <b>Count</b> | <b>Percentage</b> | <b><i>p</i>-Value</b> | <b>Adjusted <i>p</i>-value</b> |
|-----------------------------------------------------------------|--------------|-------------------|-----------------------|--------------------------------|
| Biological process                                              |              |                   |                       |                                |
| Immune response                                                 | 5            | 1.3               | <0.001                | <0.001 <sup>a</sup>            |
| Cellular response to interleukin-1                              | 3            | 0.8               | <0.001                | 0.01 <sup>a</sup>              |
| Cellular response to tumor necrosis factor                      | 3            | 0.8               | <0.001                | 0.02 <sup>a</sup>              |
| Cellular response to lipopolysaccharide                         | 3            | 0.8               | <0.001                | 0.01 <sup>a</sup>              |
| Regulation of vascular endothelial growth factor production     | 2            | 0.5               | 0.001                 | 0.04 <sup>a</sup>              |
| Negative regulation of interleukin-1-mediated signaling pathway | 2            | 0.5               | 0.001                 | 0.04 <sup>a</sup>              |
| PERK-mediated unfolded protein response                         | 2            | 0.5               | 0.003                 | 0.10                           |
| Inflammatory response                                           | 3            | 0.8               | 0.003                 | 0.09                           |
| Cellular response to dexamethasone stimulus                     | 2            | 0.5               | 0.007                 | 0.17                           |
| Cellular response to fibroblast growth factor stimulus          | 2            | 0.5               | 0.007                 | 0.16                           |
| Response to amino acid                                          | 2            | 0.5               | 0.007                 | 0.15                           |
| Response to antibiotic                                          | 2            | 0.5               | 0.008                 | 0.14                           |
| Acute-phase response                                            | 2            | 0.5               | 0.009                 | 0.15                           |
| Monocyte chemotaxis                                             | 2            | 0.5               | 0.01                  | 0.15                           |
| Response to heat                                                | 2            | 0.5               | 0.01                  | 0.16                           |
| Humoral immune response                                         | 2            | 0.5               | 0.01                  | 0.18                           |
| Response to glucocorticoid                                      | 2            | 0.5               | 0.02                  | 0.19                           |
| Neutrophil chemotaxis                                           | 2            | 0.5               | 0.02                  | 0.18                           |
| Chemokine-mediated signaling pathway                            | 2            | 0.5               | 0.02                  | 0.18                           |
| Defense response to Gram-positive bacterium                     | 2            | 0.5               | 0.02                  | 0.21                           |
| Chemotaxis                                                      | 2            | 0.5               | 0.03                  | 0.27                           |
| Cytokine-mediated signaling pathway                             | 2            | 0.5               | 0.03                  | 0.28                           |
| Regulation of cell shape                                        | 2            | 0.5               | 0.03                  | 0.28                           |
| Aging                                                           | 2            | 0.5               | 0.04                  | 0.31                           |

|                                              |   |     |       |                    |
|----------------------------------------------|---|-----|-------|--------------------|
| Positive regulation of ERK1 and ERK2 cascade | 2 | 0.5 | 0.04  | 0.32               |
| Angiogenesis                                 | 2 | 0.5 | 0.05  | 0.37               |
| Negative regulation of cell proliferation    | 2 | 0.5 | 0.09  | 0.55               |
| Cellular component                           |   |     |       |                    |
| Extracellular space                          | 4 | 1.0 | 0.002 | 0.046 <sup>a</sup> |
| Intracellular                                | 3 | 0.8 | 0.03  | 0.37               |
| Extracellular region                         | 3 | 0.8 | 0.04  | 0.35               |
| Molecular function                           |   |     |       |                    |
| Chemokine activity                           | 2 | 0.5 | 0.01  | 0.22               |
| Cytokine activity                            | 2 | 0.5 | 0.04  | 0.36               |
| Receptor binding                             | 2 | 0.5 | 0.08  | 0.45               |

---

Abbreviations: OSA, obstructive sleep apnea; <sup>a</sup>*P*-values <0.05 adjusted using the Benjamini method were statistically significant.
